# Supplementary material
Source: publisher figshare collection journal article supplement (https://karger.figshare.com/ndownloader/files/24618821)
Supplement: Supplementary file 1 [file 24618821]

**Supplementary Table 1 All differentially expressed miRNAs in ischemic stroke**

| **MiRNA** | **Log2Fold Change** | **P value** | **Up/down** |
| --- | --- | --- | --- |
| hsa-miR-3145-3p | -1.97594 | 0.000196 | down |
|  |  |  |  |
| hsa-miR-3673 | -2.0194 | 0.000223 | down |
|  |  |  |  |
| hsa-miR-4424 | -1.55944 | 0.001154 | down |
|  |  |  |  |
| hsa-miR-3127-5p | -1.55496 | 0.001268 | down |
|  |  |  |  |
| hsa-miR-5194 | -1.50735 | 0.001305 | down |
|  |  |  |  |
| hsa-miR-206 | -1.39259 | 0.001342 | down |
|  |  |  |  |
| hsa-miR-302a-3p | -1.2468 | 0.001522 | down |
|  |  |  |  |
| hsa-miR-3156-3p | -1.23207 | 0.001856 | down |
|  |  |  |  |
| hsa-miR-4503 | -1.19667 | 0.002015 | down |
|  |  |  |  |
| hsa-miR-548as-3p | -1.27479 | 0.002147 | down |
|  |  |  |  |
| hsa-miR-4765 | -1.07569 | 0.002876 | down |
|  |  |  |  |
| hsa-miR-3171 | -1.13701 | 0.003203 | down |
|  |  |  |  |
| hsa-miR-3146 | -1.11251 | 0.005445 | down |
|  |  |  |  |
| hsa-miR-3591-5p | -1.20383 | 0.007125 | down |
|  |  |  |  |
| hsa-miR-488-3p | -1.05202 | 0.00792 | down |
|  |  |  |  |
| hsa-miR-325 | 1.690707 | 0.017946 | up |
|  |  |  |  |
| hsa-miR-5579-5p | 1.396879 | 0.018424 | up |
|  |  |  |  |
| hsa-miR-4741 | 1.229919 | 0.022482 | up |
|  |  |  |  |
| hsa-miR-3917 | 1.133691 | 0.022999 | up |
|  |  |  |  |
| hsa-miR-548k | 1.2589 | 0.023256 | up |
|  |  |  |  |
| hsa-miR-4782-5p | 2.736098 | 0.02331 | up |
|  |  |  |  |
| hsa-miR-1263 | 1.984451 | 0.024693 | up |
|  |  |  |  |
| hsa-miR-4262 | 1.023258 | 0.030544 | up |
| hsa-miR-5089 | 1.929018 | 0.031288 | up |
|  |  |  |  |
| hsa-miR-3622b-5p | 3.078436 | 0.035993 | up |
|  |  |  |  |
| hsa-miR-4491 | 1.858356 | 0.038002 | up |
